# Supplementary material for: The JMU-SalVac-System: A Novel, Versatile Approach to Oral Live Vaccine Development
Source: MDPI journal article supplement (doi:10.3390/vaccines12060687), 2024-06-20
Supplement: s1 [file s1]

# Supplementary information

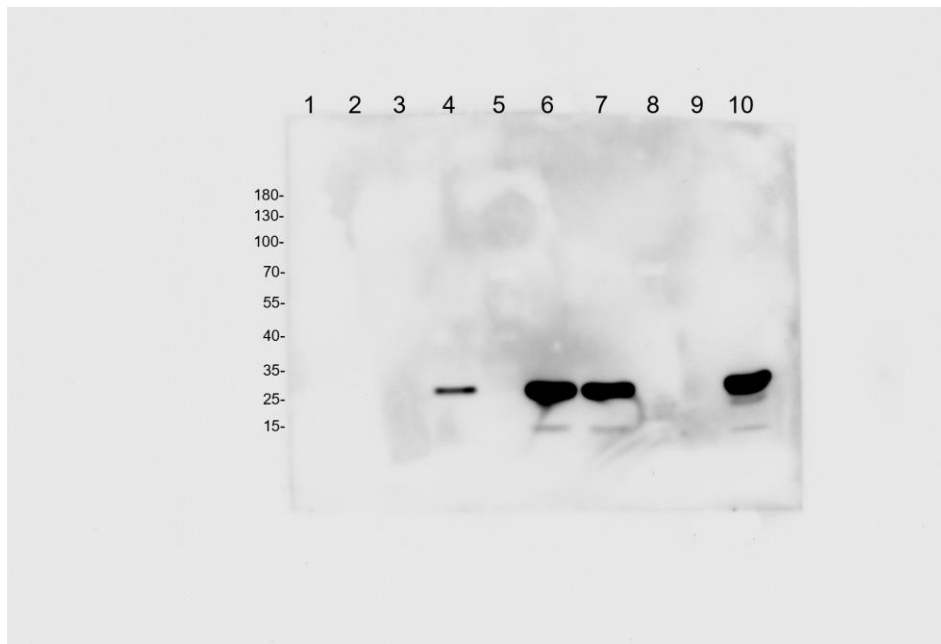

Supplementary Figure S1. Uncropped western blot picture of Figure 3. Expression of CTB-FLAG in supernatant fractions (SN) Lanes 1: PageRuler Prestained Protein ladder (Thermo Fisher), 2: Supernatant (SN) Ty21a 3: SN BLS-A0\_B0, 4: SN BLS-ActxB\_B0, 5: PageRuler Prestained Protein ladder (Thermo Fisher), 6-10: unrelated experiments.

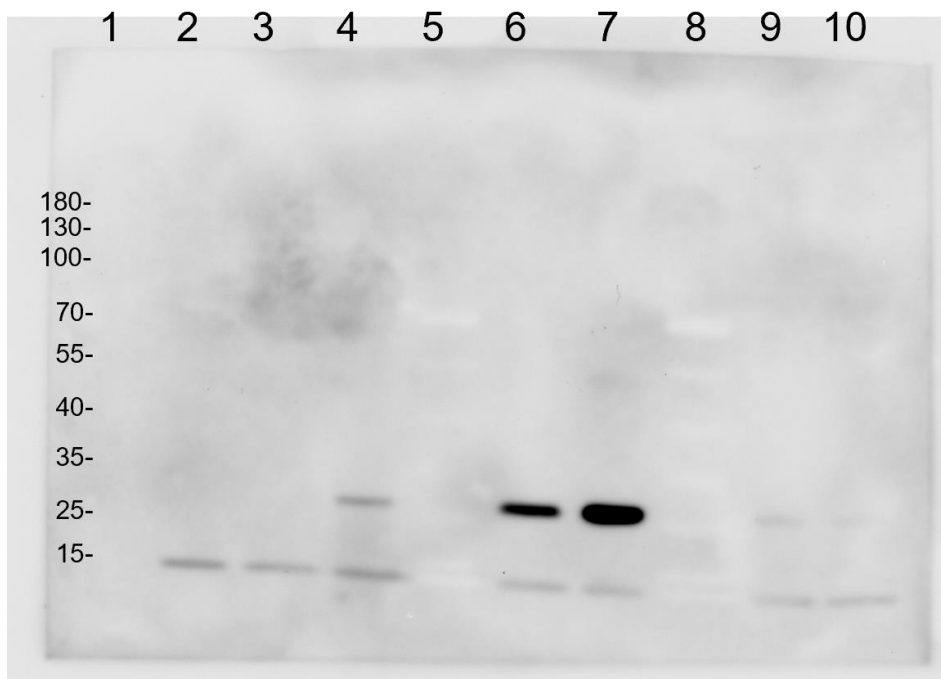

Supplementary Figure S2. Uncropped western blot picture of Figure 3. Expression of CTB-FLAG in whole cell lysate (WCL) Lanes 1: empty, 2: WCL Ty21a 3: WCL BLS-A0\_B0, 4: WCL BLS-ActxB\_B0, 5:

PageRuler Prestained Protein ladder (Thermo Fisher), 6-10: unrelated experiments

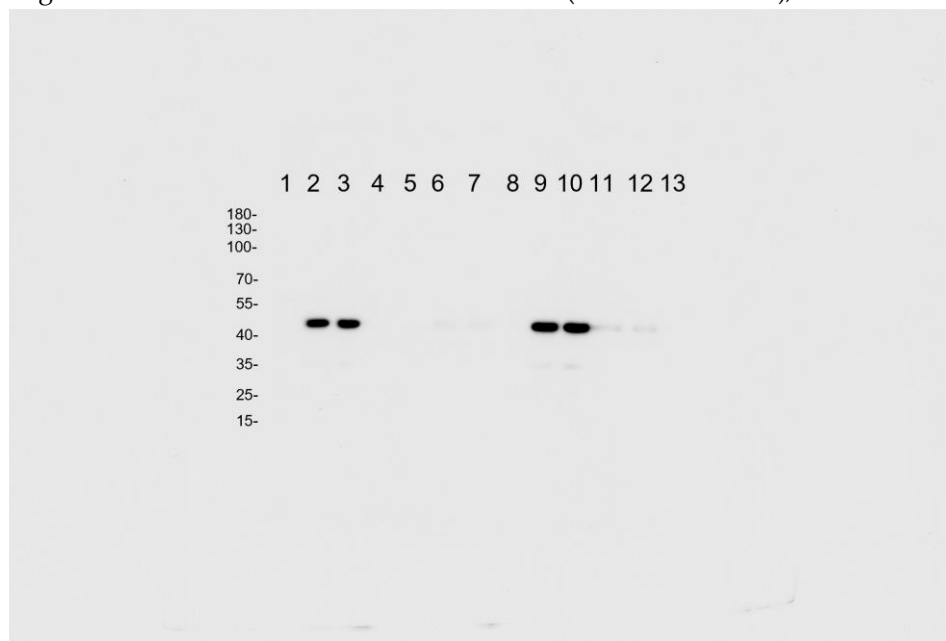

Supplementary Figure S3. Uncropped western blot picture of Figure 3. Detection of TyrS-His in whole cell lysate (WCL) and supernatant fractions (SN) Lanes 1: WCL Ty21a 2: WCL BLS-A0\_B0, 3: WCL BLS-ActxB\_B0, 4: PageRuler Prestained Protein ladder (Thermo Fisher), 5: SN Ty21a, 6: SN BLS-A0\_B0, 7: SN BLS-ActxB\_B0, 8: PageRuler Prestained Protein ladder (Thermo Fisher), 9-13: unrelated experiments.

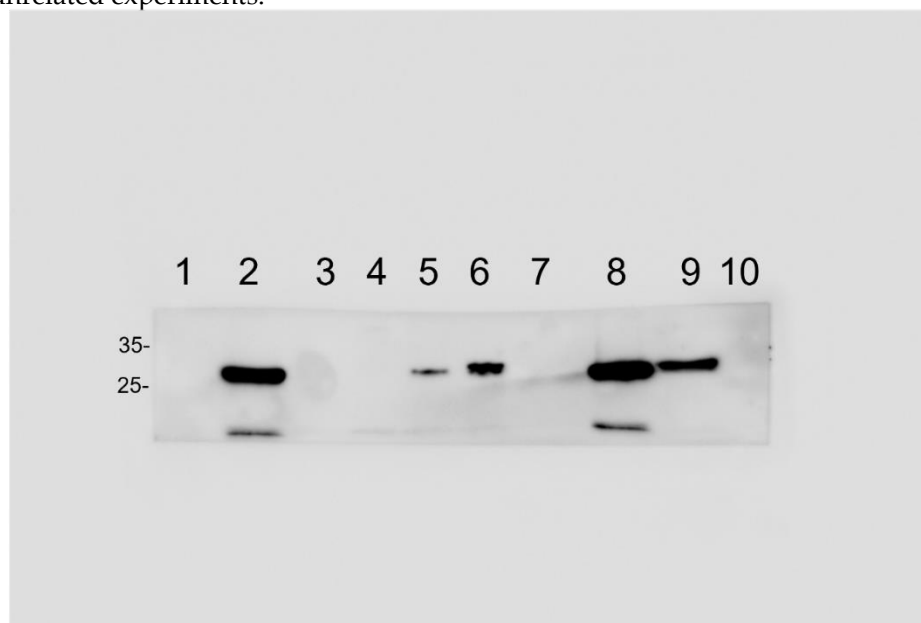

Supplementary Figure S4. Uncropped western blot picture of Figure 6. Lanes 1: Supernatant (SN) BLS-A0\_B0, 2: SN BLS-ActxB\_BDR, 3: PageRuler Prestained Protein ladder (Thermo Fisher), 4: Whole cell lysate (WCL) BLS-A0\_B0, 5: WCL BLS-ActxB\_BDR, 6: WCL BLS-ActxB\_BDR +0.2% arabinose, 7: SN BLS-A0\_B0, 8: SN BLS-ActxB\_BDR, 9: SN BLS-ActxB\_BDR +0.2% arabinose, 10: PageRuler Prestained Protein ladder.

# A

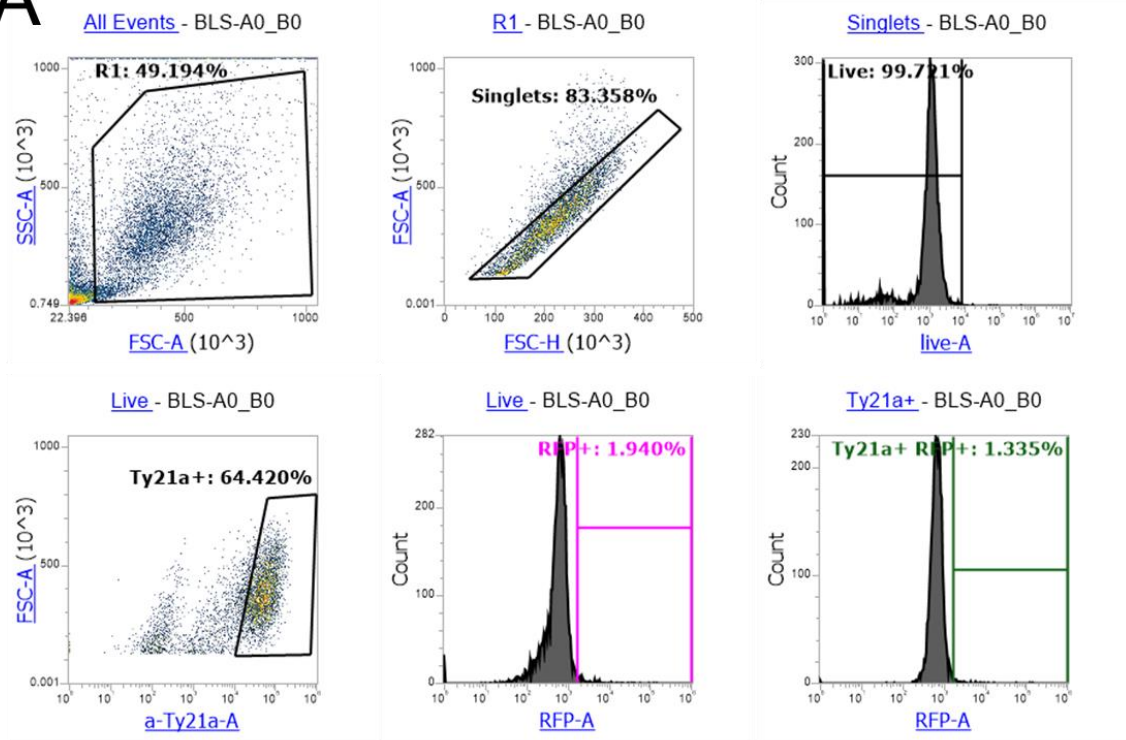

# B

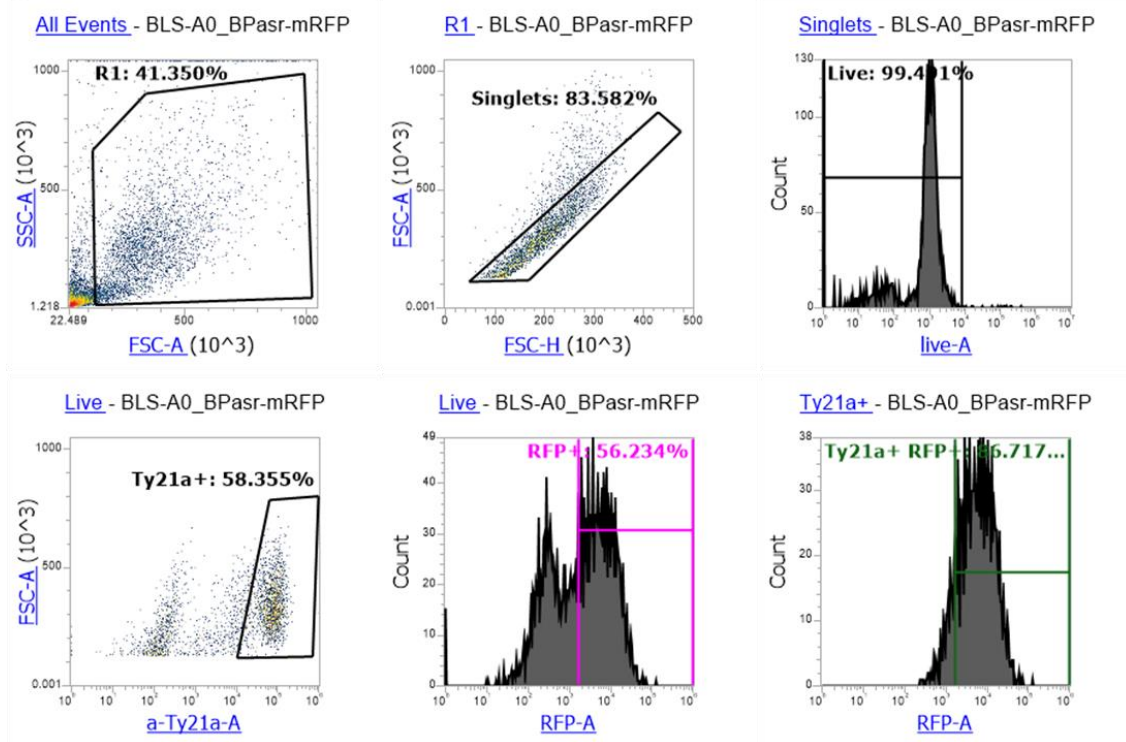

Supplementary Figure S5. Gating strategy for flow cytometry experiments. Cells were gated against debris (gate “R1”), for singlets (“Singlets”), live cells (“Live”) and subsequently for signal of anti-Ty21a staining (“Ty21a+”) or RFP (“RFP+”). The Ty21a+ population was further subgated for RFP signal (“Ty21a+RFP+”). Gates were set based on non-infected (Ty21a+ gate), or BLS-A0\_B0 infected cells (RFP+

gate, see panel (A)). Panel (B) shows infection with BLS-A0\_BP<sub>asr</sub>-mRFP. The data was analyzed with the Attune™ Cytometric Software v5.2.0.

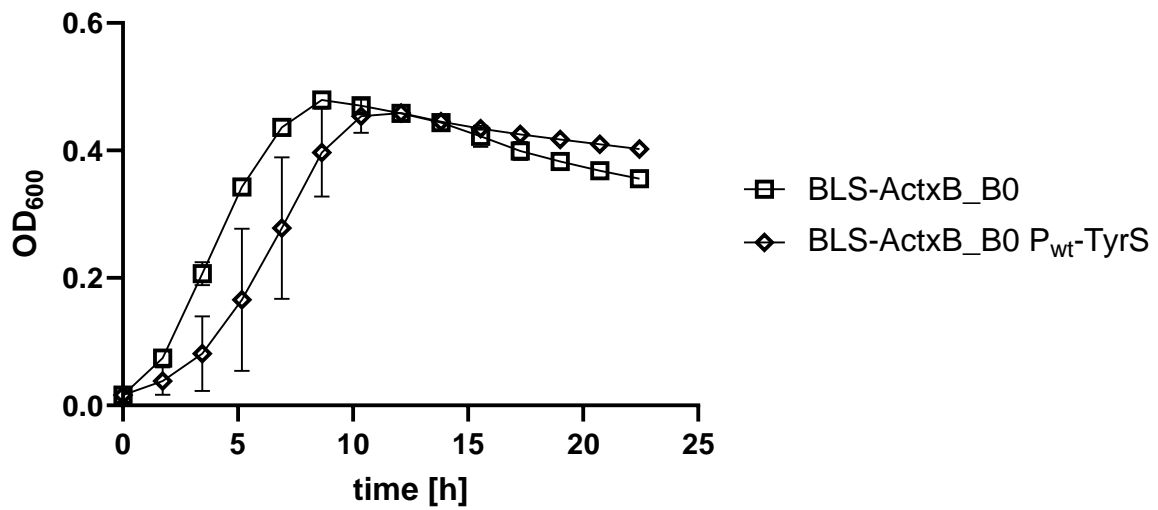

Supplementary Figure S6. Growth curve analysis of BLS-ActxB\_B0 Pwt-TyrS.

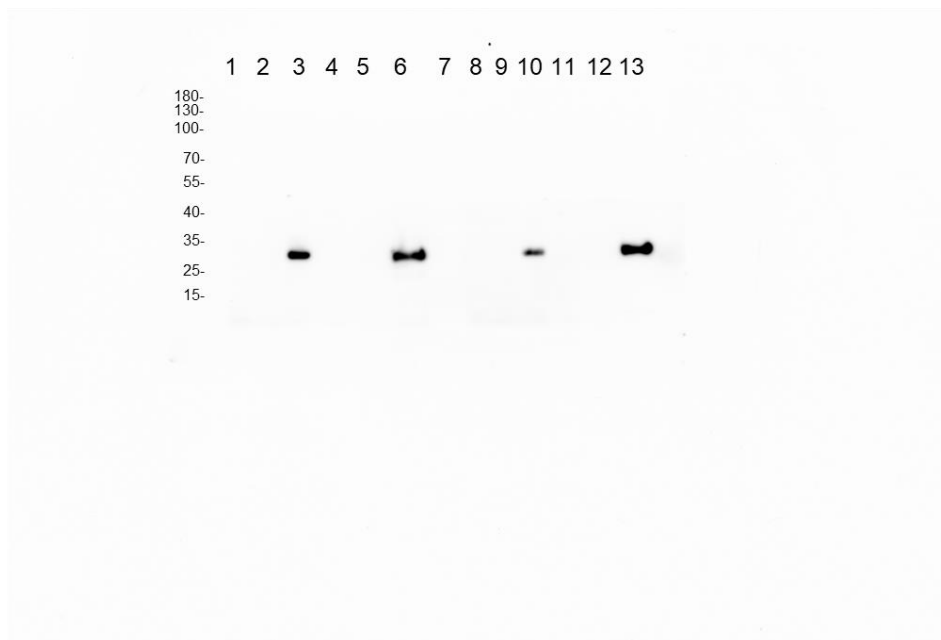

Supplementary Figure S7. Uncropped western blot picture of Figure 3F. Expression of CTB-FLAG in whole cell lysate (WCL) and TCA precipitated supernatants (SN) Lanes 1: WCL Ty21a, 2: WCL BLS-A0\_B0, 3: WCL BLS-ActxB\_B0, 4: SN Ty21a, 5: SN BLS-A0\_B0, 6: SN BLS-ActxB\_B0, 7: PageRuler Prestained Protein ladder (Thermo Fisher), 8: WCL Ty21a, 9: WCL BLS-A0\_B0, 10: WCL BLS-ActxB\_B0, 11: SN Ty21a, 12: SN BLS-A0\_B0, 13: SN BLS-ActxB\_B0.

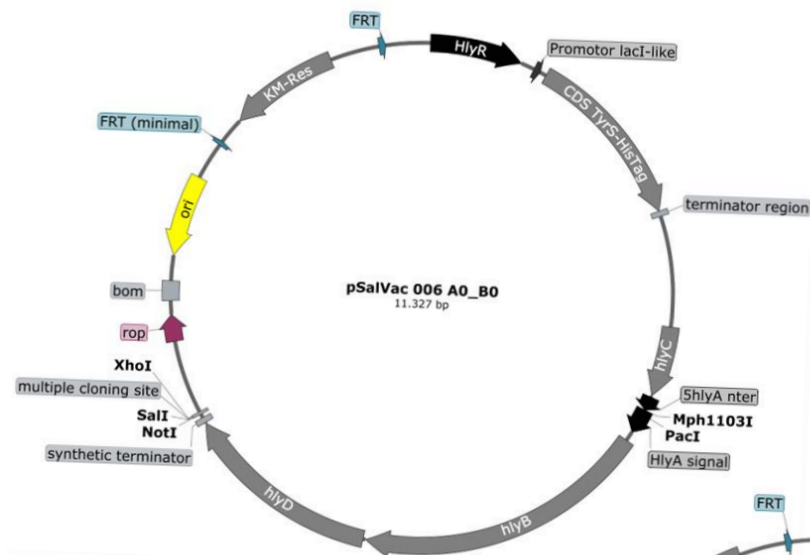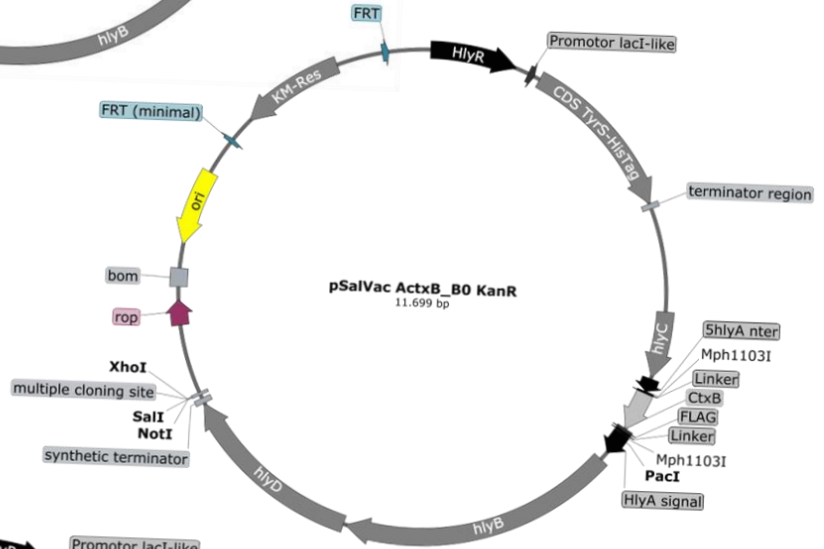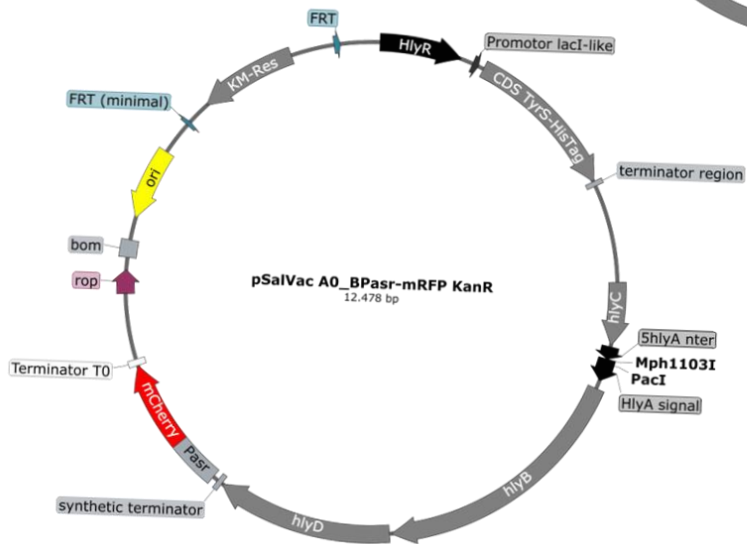

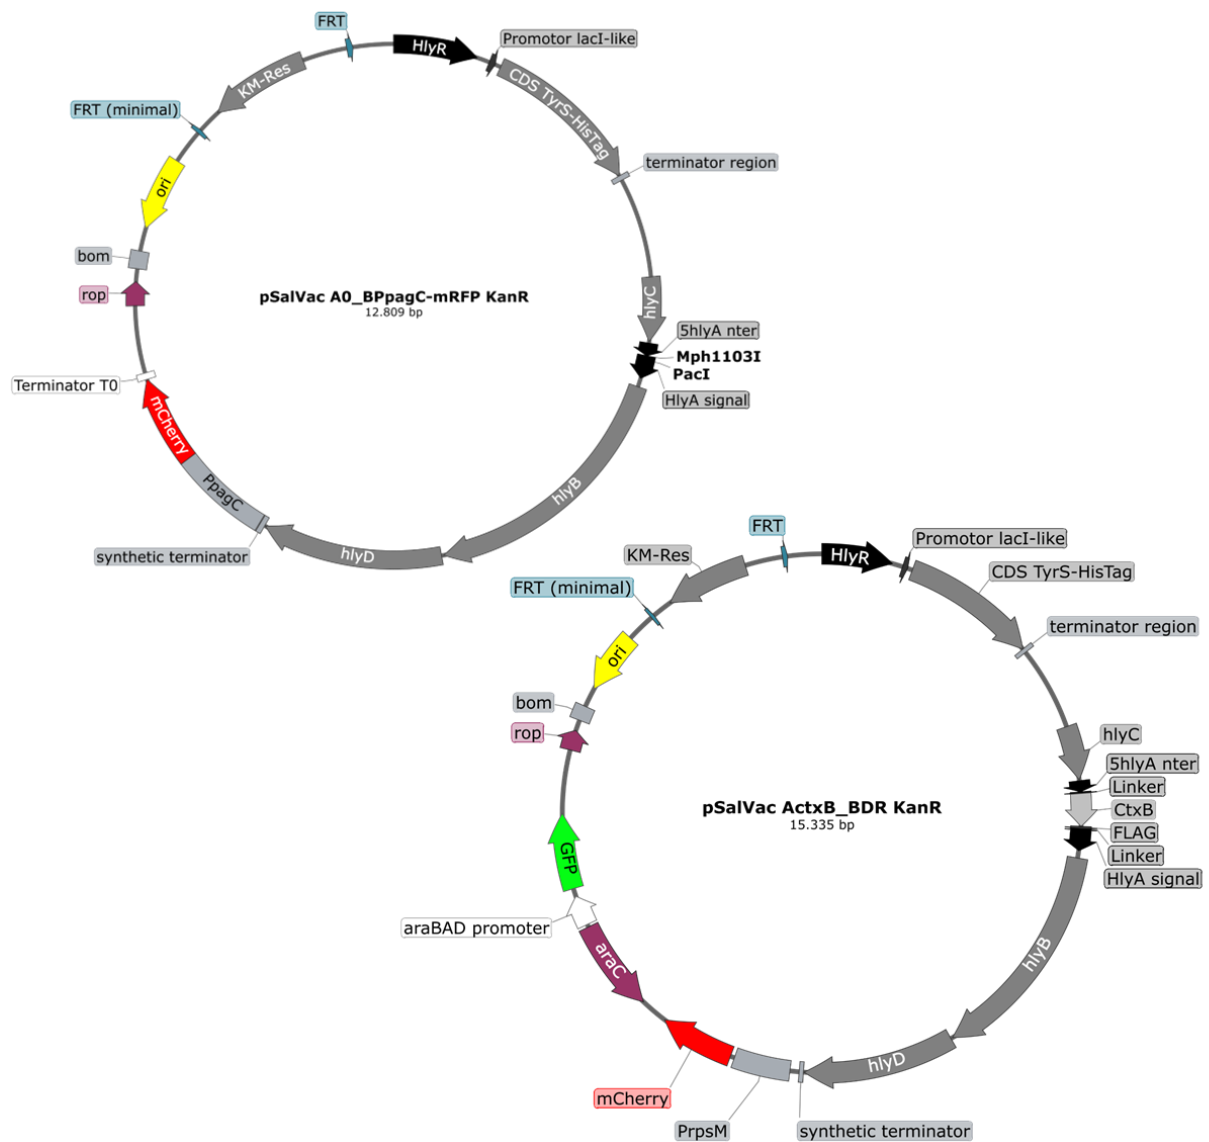

Supplementary Figure S8. Plasmid maps of key vectors used in this study.

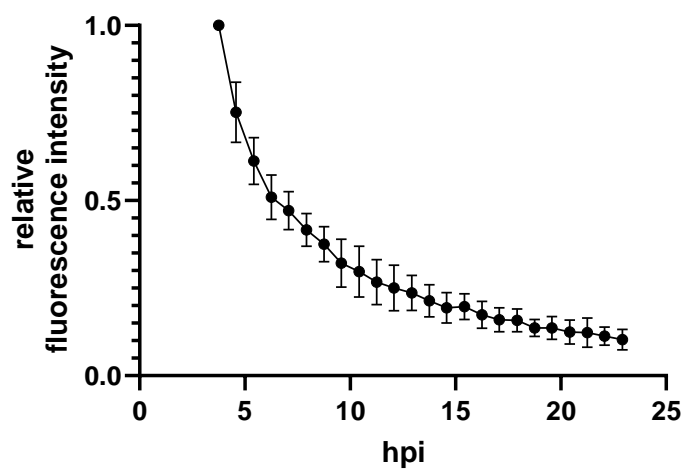

Supplementary Figure S9. Relative mRFP fluorescence intensity during live cell imaging infection with BLS-ActxB\_B0 in hMDM. The fluorescence intensity of mRFP measured via live cell infection

microscopy was normalized to the first measured frame at 3.75 h past infection (hpi). Three independent experiments were performed in hMDMs differentiated from PBMCs from two different donors.
