# Supplementary material for: The JMU-SalVac-System: A Novel, Versatile Approach to Oral Live Vaccine Development
Source: MDPI journal article supplement (doi:10.3390/vaccines12060687), 2024-06-20
Supplement: s1 [file s1]

**Table S1. Primers.**

| Primer                     |                                                                                                                                                                    |                 |
|----------------------------|--------------------------------------------------------------------------------------------------------------------------------------------------------------------|-----------------|
| Mut-pKD3-Spel-forward      | GTG ATC TTC CGT <u>CAC TAG TAG</u><br>GCG CGC CGA AG                                                                                                               | Bcul-site       |
| Mut-pKD3-Spel-reverse      | CTT CGG CGC GCC <u>TAC TAG TGA</u><br>CGG AAG ATC AC                                                                                                               | Bcul-site       |
| Spel-tyrS-EPK-forward      | AAA AAA <u>ACT AGT</u> GTT CCC TGT<br>ATA AAA ACC AGG GGG                                                                                                          | Bcul-site       |
| tyrS-EPK-Spel-reverse      | TTT TTT <u>ACT AGT</u> GTA AAT TCC<br>TGG AGC TGA AGC AGA AG                                                                                                       | Bcul-site       |
| Ter-HisTag-1-forward       | CCC CCT TTC CAC TTA ATG CAT<br><u>TAG TGA TGG TGA TGG TGA TGT</u><br>TTC CAG CAA ATC AGA CAG TAA<br>TTC                                                            | x6HisTag        |
| Spel-Ter-HisTag-2-forward  | AAA AAA <u>ACT AGT</u> GTT CCC TGT<br>ATA AAA ACC AGG GGG AGT GAT<br>TTC TCA CTC CCC CTT TCC ACT<br>TAA TGC ATT AG                                                 | Bcul-site       |
| tyrS-HisTag-reverse        | <u>CAT CAC CAT CAC CAT CAC</u> GCA<br>AGC AGT AAC TTG ATT AAA                                                                                                      | x6HisTag        |
| knockout-forward           | <b>GTG TAC CGG CAA AGG TGC AGT</b><br><b>CGT TTT ATA CAT GGA GAT TTT</b><br><b>GAT GGC</b> <u>AGT GTA GGC TGG AGC</u><br><u>TGC TTC</u>                            |                 |
| knockout-reverse           | <b>GAT AGT GAC AGC GTT GGA GGC</b><br><b>GAT AGT CTT ACG CGC CTG ACC</b><br><b>ACG TGA CGG</b> <u>ATG GG A ATT AGC</u><br><u>CAT GGT CC</u>                        |                 |
| Spel-IS2-Deletion-forward  | AAA <u>AAC TAG TGA</u> TAA TGG TTC<br>ATG CTA CCG GGC GAA TG                                                                                                       | Bcul-site       |
| IS2-Deletion-BamHI-reverse | GTT TTG <u>GGA TCC</u> ACC CTG ATG<br>GCT CTG                                                                                                                      | BamHI-site      |
| LacI-Prom.for              | AAA <u>AGT CGA CTA GTG</u> CTA GCG<br>ACA CCA TCG AAT GGC GCA AAC<br>CTT TCG CGG TAT GGC ATG ATA<br>GCG CCC GAA <b>GTC GTG TAC CGG</b><br><b>CAA AGG TGA GTC G</b> | Sall/Spel-sites |
| LacI-Ter-rev               | AAA AAA <u>GTC GAC TAG TGG</u> TAC<br>CAA AAT GCC GCC AGC CCA AAC                                                                                                  | Sall/Spel-sites |

|                         |                                                                |                                       |
|-------------------------|----------------------------------------------------------------|---------------------------------------|
|                         | TGG CGG CCG TGG ATT <b>AGT GAT GGT GAT GGT GAT GTT</b> TCC AGC |                                       |
| pMO-tyrS-screen-forward | CCC TGA ATC TCC AGA CAA CCA ATA TCA                            | screening                             |
| pMO-tyrS-screen-forward | CCC GTA CAA ATT CTA CCA GTT CTG GA                             | screening                             |
| CH19 bsite mcs rev      | TCGACGCGGCCGCATGATTCAAAT GGATCAACATCTCGAGGAGCTCG               | Insertion of MCS in pSalVac 001 A0_B0 |
| CH18 bsite mcs fwd      | TCGACGAGCTCCTCGAGATGTTGA TCCATTTGAATCATGCGGCCGCG               | Insertion of MCS in pSalVac 001 A0_B0 |
| CH56 IF TyrS fwd        | CACCAGCGTGTTTCGTGTCATGTGC CACCTGACGTCTAAGAA                    | Excision of AmpR promoter             |
| CH58 IF Kmres rev       | ATGACACGAACACGCTGGTGCGT GTCGCCCTTATTCCCTT                      | Excision of AmpR promoter             |
| CH61 B1006 rev          | GGCCGCaaaaaaaacccccgccctgtcag gggcggggtttttttGAGCT             | Synthetic terminator                  |
| CH60 B1006 fwd          | Caaaaaaaacccccgccctgacagggcggg gtttttttGC                      | Synthetic terminator                  |
| CH110 IF4 gen6 Km fwd   | GCGGCCGCgtcgacCTCGAGgaacata tccatcgcggtccg                     | Deletion of non coding elements       |
| CH235 ctxB flag         | tcgtcgtcgtctttagtagtcgttcgcatggagatcg ccgc                     | Insertion of ctxB in A-site           |
| CH239 flp KO            | ATGACACGAACACGCTGGTgaagat cccccacgctg                          | Deletion of downstream KanR FRT site  |
| CH53 IF 204 fwd         | acaaagcacgaaagATGCATCAGAAGC GGC                                | Insertion of ctxB in A-site           |
| CH146 pasr fwd          | CCATGGTCCCTCAAGCGTTAataat ccggcgatagcaacg                      | Insertion of Pasr in B-site           |
| CH151 asr rev           | tttgtacccccgatttggttttc                                        | Insertion of Pasr in B-site           |
| CH156 mCherry fwd       | accaaatcgggggtaacaaaatggtgagcaag ggcgag                        | Fusion of Pasr to mRFP in B-site      |
